# Supplementary material
Source: publisher figshare collection journal article supplement (https://acs.figshare.com/ndownloader/files/5186353)

Biochemistry  
1/7/04

Nishina, *et al.*  
Prion protein solubilization

**Supplemental Figure S1:** Freeze-thaw stability of detergent-solubilized supernatant samples. Samples were solubilized with the addition of CHAPSO, CHAPS, or NOG as indicated and were either subjected to centrifugation at 20800 x *g* or 100000 x *g* for 1 hour. Supernatant samples were subject to freeze/thaw cycles as indicated. The samples were frozen at  $-70^{\circ}\text{C}$  for 30 minutes each cycle and thawed at  $37^{\circ}\text{C}$  for ~1 minute. NS = sample not subjected to centrifugation, Sc = diluted scrapie brain homogenate alone.

Figure S1

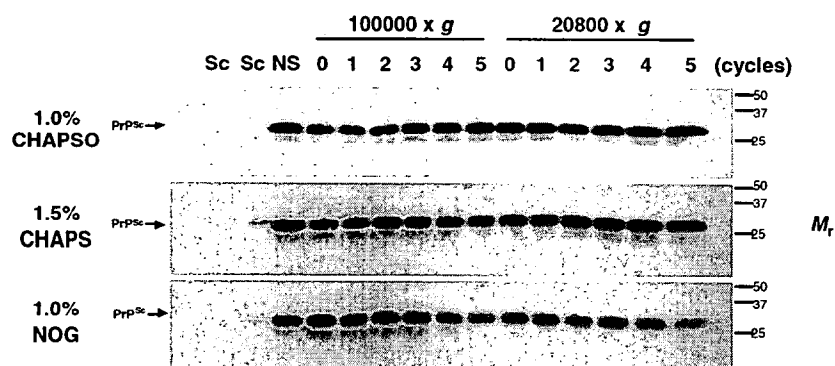

Supplement: Supplementary file 1 [file 5186353]
